# Supplementary material
Source: publisher site journal article supplement (https://www.dovepress.com/get_supplementary_file.php?f=270813.docx)
Supplement: Supplementary file 1 [file get_supplementary_file.php]

**
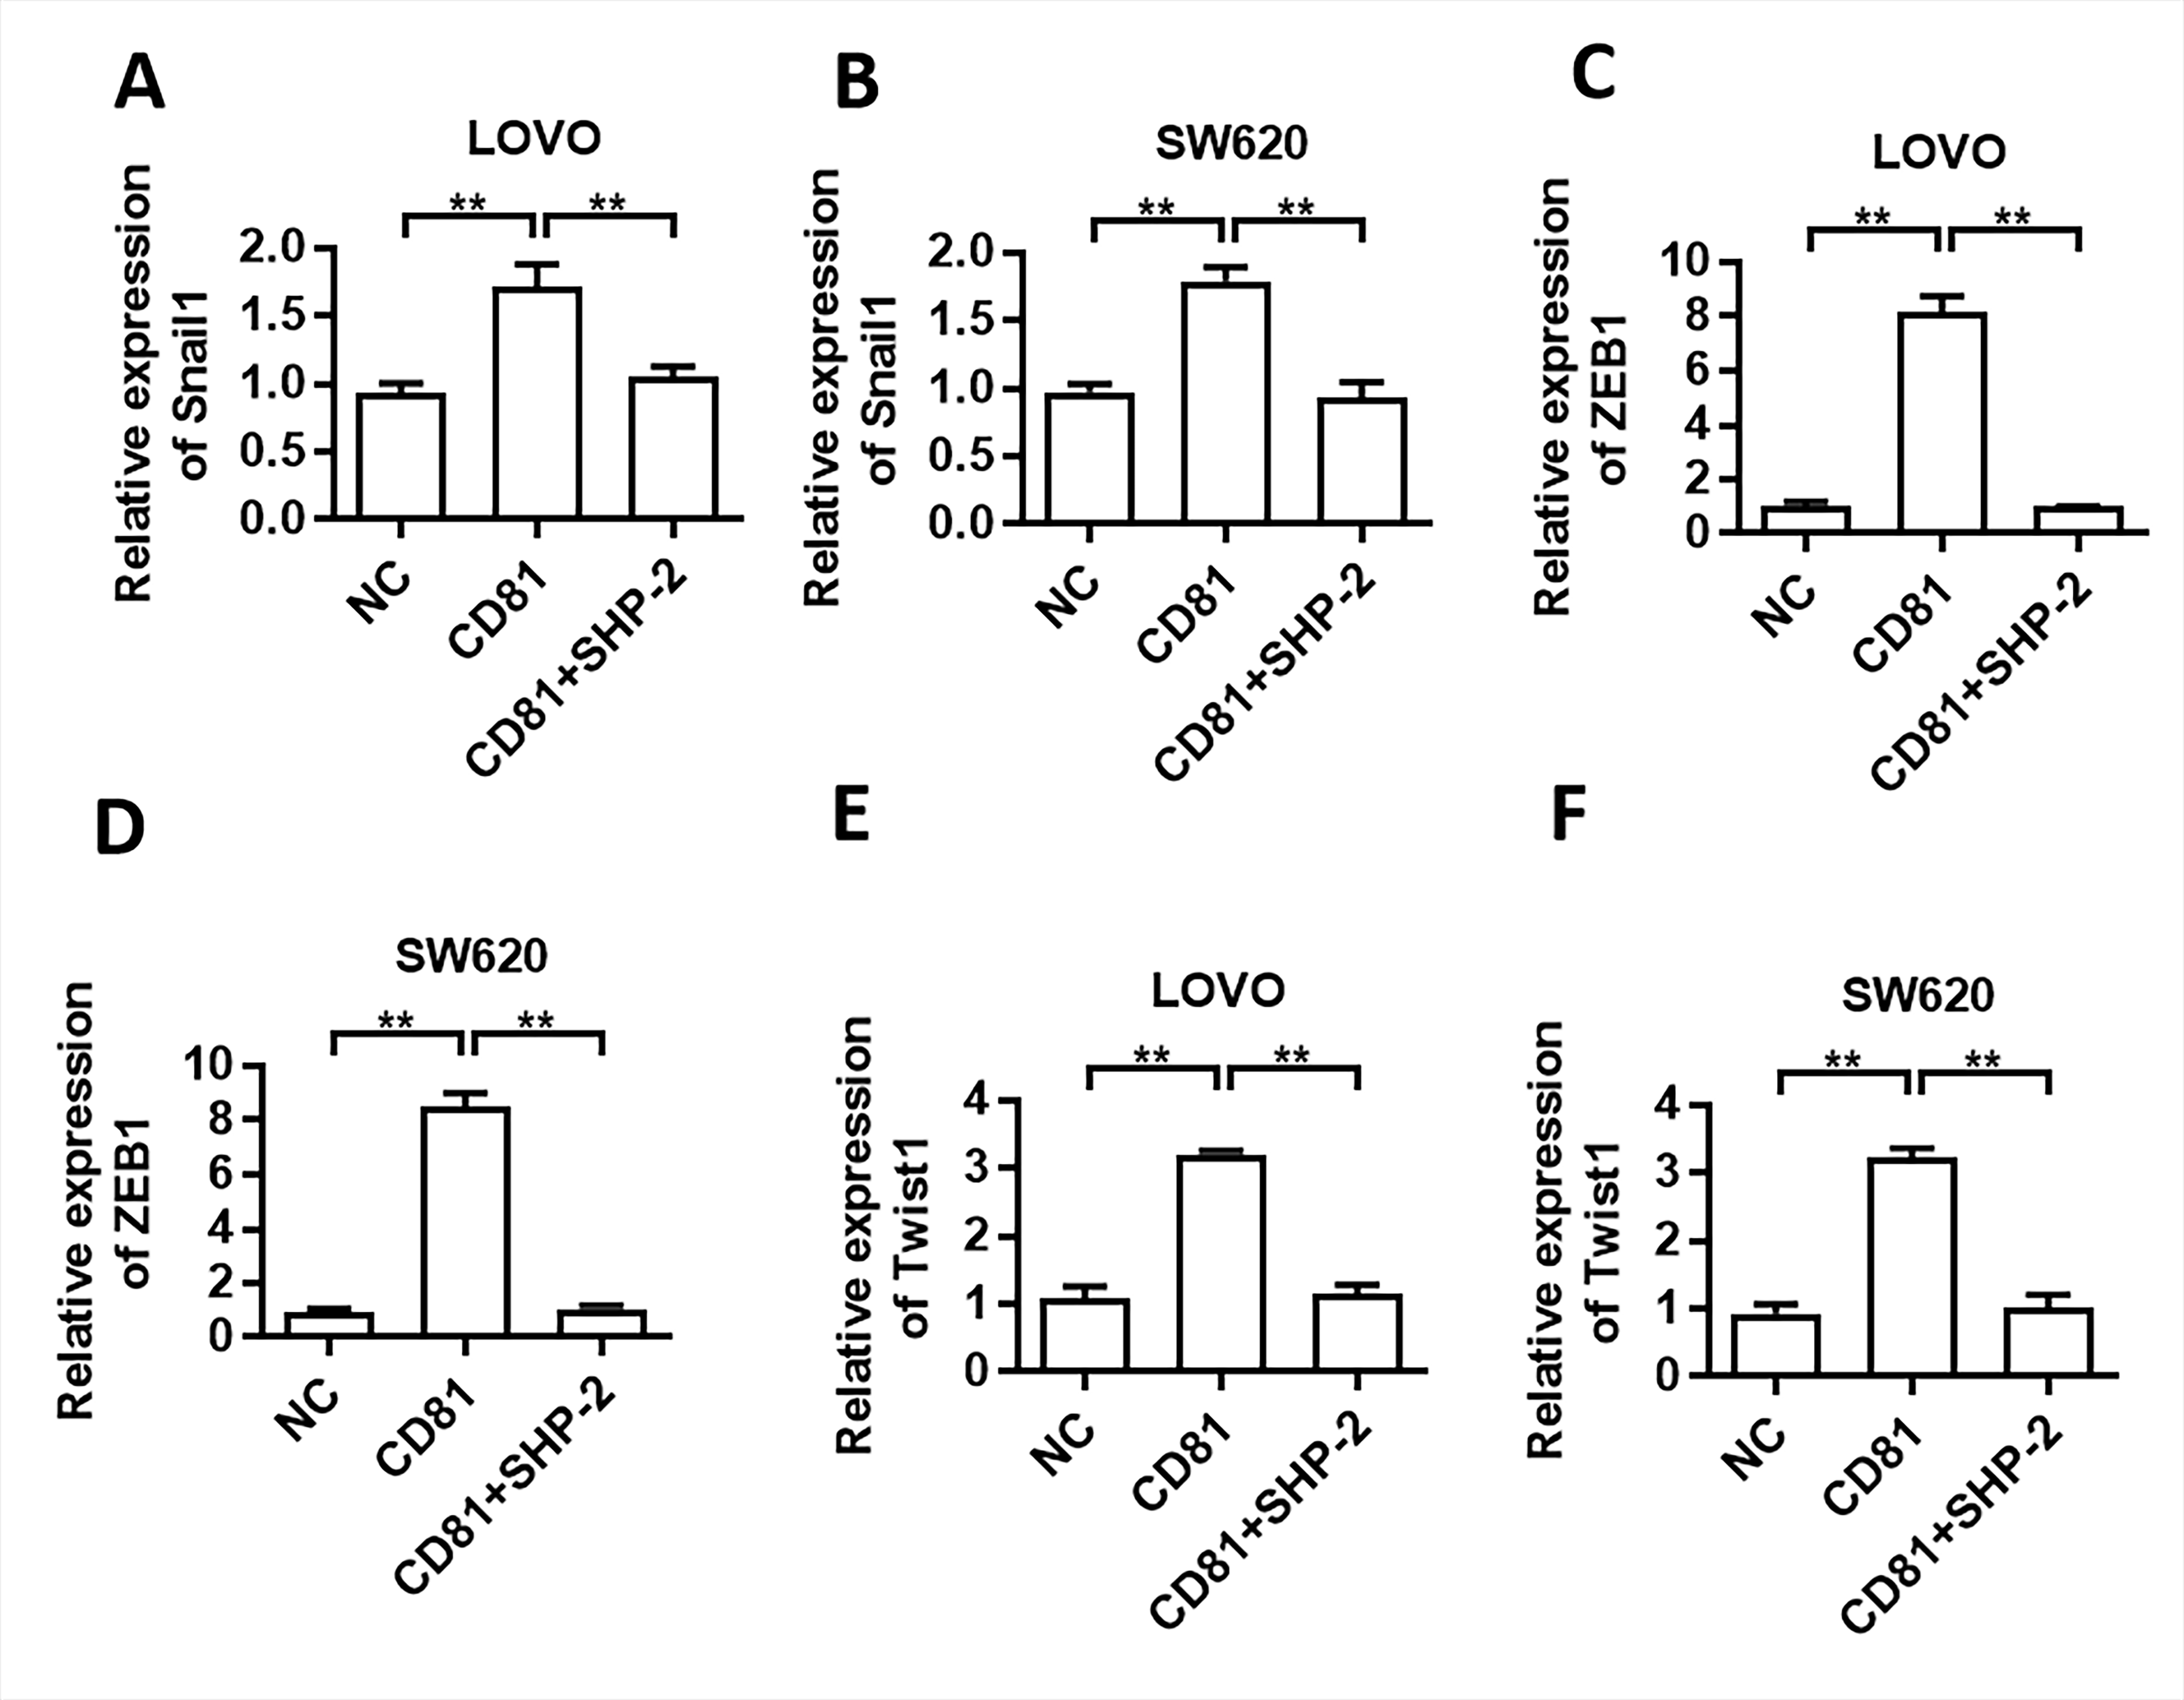
**

**Figure S1. Expression changes in important tumor transcription factors Snail1, ZEB1, and Twist1 in CD81-activated and CD81/SHP-2-activated CRC cells.** A. Detection of Snail1 expression in LOVO cells. B. Detection of Snail1 expression in SW620 cells. C. Detection of ZEB1 expression in LOVO cells. D. Detection of ZEB1 expression in SW620 cells. E. Detection of Twist1 expression in LOVO cells. F. Detection of Twist1 expression in SW620 cells. ** represents p < 0.01.
